# Supplementary material for: Discovery of potent cross-neutralizing antibodies for the treatment of Marburg virus disease
Source: Research Square preprint supplement (doi:10.21203/rs.3.rs-7102720/v1), 2025-08-04
Supplement: Supplementary file 2 [file 3b5cb95154b6d4530692d853.docx]

**Supplementary Table 1. Neutralizing activity of AGP-R mAbs against VSVΔG*MARV-Angola, VSVΔG*MARV-Musoke, and VSVΔG*RAVV**

| mAbs | VSVΔG*MARV-Angola | | VSVΔG*MARV-Musoke | | VSVΔG*RAVV | |
| --- | --- | --- | --- | --- | --- | --- |
| IC50 (μg/mL) | 95% CI (μg/mL) | IC50 (μg/mL) | 95% CI (μg/mL) | IC50 (μg/mL) | 95% CI (μg/mL) |
| AGP-R1 | 0.9806 | 0.8074 to 1.209 | 0.7036 | 0.6574 to 0.7527 | 0.9859 | Undetermined |
| AGP-R7 | 0.3892 | 0.2999 to 0.4971 | 0.4107 | 0.2638 to 0.6103 | 0.6107 | 0.4371 to >1000 |
| AGP-R12 | 1.255 | <0.01 to 1.839 | 0.6124 | 0.4162 to 0.9220 | 0.9192 | 0.7410 to 1.149 |
| AGP-R15 | 0.8679 | 0.5450 to 1.421 | 0.3511 | 0.2642 to 0.4700 | 0.5889 | 0.4737 to 0.7220 |
| AGP-R17 | 1.408 | <0.01 to 2.348 | 0.97 | 0.7259 to 1.325 | 1.054 | Undetermined |
| MR78 | 0.6777 | 0.5885 to 0.7841 | 0.2744 | 0.1698 to 0.4794 | 2.201 | 1.385 to 4.236 |
| AGP-R4 | 0.134 | 0.1052 to 0.1728 | 0.06995 | 0.06428 to 0.07610 | Undetermined | Undetermined |
| AGP-R5 | 0.218 | 0.1802 to 0.2649 | 0.1205 | 0.09893 to 0.1478 | Undetermined | Undetermined |
| AGP-R11 | 0.05436 | 0.04380 to 0.06721 | 0.04148 | 0.03937 to 0.04368 | Undetermined | Undetermined |
| AGP-R20 | 0.09966 | Undetermined | 0.05866 | 0.05000 to 0.06873 | Undetermined | Undetermined |
| AGP-R22 | 0.0708 | 0.06129 to 0.08121 | 0.04177 | 0.03588 to 0.04852 | Undetermined | Undetermined |

Neutralizing activity curves were generated using nonlinear four-parameter logistic regression based on triplicate assay results. The half-maximal inhibitory concentration (IC50) and corresponding 95% confidence intervals (CIs), expressed in μg/mL, were calculated for each AGP-R mAb and MR78 against VSVΔG*MARV-Angola, VSVΔG*-Musoke, and VSVΔG*RAVV, representing the antibody concentration required to reduce pseudovirus infectivity by 50% based on the fitting curves. IC50 values with 95% CIs below 0.01 μg/mL or above 1,000 μg/mL are denoted as “<0.01” and “>1000,” respectively. “Undetermined” indicates that a reliable IC50 or 95% CI could not be calculated due to poor curve fitting or failure to achieve 50% neutralization.

**Supplementary Table 2. Neutralizing activity of AGP-R mAbs against MARV and RAVV**

| mAbs | MARV-Angola | | | RAVV | | |
| --- | --- | --- | --- | --- | --- | --- |
| IC50 (μg//mL) | 95% CI (μg//mL) | *R*2 | IC50 (μg//mL) | 95% CI (μg//mL) | *R*2 |
| AGP-R1 | 14.88 | 8.960 to 37.37 | 0.9092 | 8.259 | 3.867 to 650.4 | 0.9437 |
| AGP-R7 | 3.355 | 2.425 to 4.696 | 0.9741 | 5.186 | 2.143 to 73.00 | 0.8808 |
| AGP-R12 | 16.61 | 10.42 to 47.07 | 0.9474 | 18.88 | 11.92 to 150.2 | 0.9273 |
| AGP-R15 | 10.29 | 4.899 to >1000 | 0.9302 | 7.495 | 3.325 to 344.5 | 0.8957 |
| AGP-R17 | 12.11 | 7.713 to 21.28 | 0.9508 | 7.492 | 4.852 to 14.84 | 0.9651 |
| MR78 | Undetermined | Undetermined | 0.5531 | Undetermined | Undetermined | 0.5375 |
| AGP-R4 | Undetermined | Undetermined | 0.7548 | Undetermined | Undetermined | 0.2330 |
| AGP-R5 | Undetermined | Undetermined | 0.7291 | NE | NE | NE |
| AGP-R11 | Undetermined | Undetermined | 0.6498 | Undetermined | Undetermined | <0.0001 |
| AGP-R20 | Undetermined | Undetermined | 0.3104 | NE | NE | NE |
| AGP-R22 | Undetermined | Undetermined | 0.7975 | NE | NE | NE |

Neutralizing activity curves were generated using nonlinear four-parameter logistic regression based on PRNT results performed in triplicate. The half-maximal inhibitory concentration (IC50) and 95% confidence intervals (CIs), expressed in μg/mL, were calculated for each AGP-R mAb and MR78 against MARV-Angola and RAVV, representing the antibody concentration required to reduce plaque counts by 50% based on the fitting curves. IC50 values with 95% CIs below 0.01 μg/mL or above 1,000 μg/mL are denoted as “<0.01” and “>1000,” respectively. R2 values indicating the quality of the curve fit are also provided. “Undetermined” indicates that reliable IC50 or 95% CI values could not be calculated due to poor curve fitting or failure to achieve 50% neutralization. Combinations of mAb and virus that were not tested are indicated as NE.
